# Supplementary material
Source: PubMed Central journal article supplement (PMC3123096)
Supplement: supp_M111.217950_jbc.M111.217950-1.pdf [file supp_M111.217950_jbc.M111.217950-1.pdf]

**Supplementary Figure 1. High concentration of NBF1 W<sub>A</sub> truncate does not affect Syn-1A-SUR1 interaction.** **A.** FRET study (as in Figure 4) shows that increasing concentrations of wt-NBF-1 W<sub>A</sub> truncate could not disrupt the FRET signal. *(i)* are representative recordings of FRET efficiency. Summaries of FRET efficiency, mean ± S.E.M., n=8 are shown as a graph *(ii)* and bar graph *(iii)*. **B.** Patch clamp study in INS-1 cells (as in Figure 2) showing that the highest concentration of wt NBF1 W<sub>A</sub> truncate (10 μM) used in *A* could not reverse Syn-1A inhibition of K<sub>ATP</sub> channel activity. Bar graph (means ± S.E.M.), n=4, \* indicate p < 0.05.

**Supplementary Figure 2. Representative examples of K<sub>ATP</sub> currents after dialysis with NBF1 or NBF2 Walker motif mutants.** Examples of whole cell currents in INS-1 cells after dialysis with indicated truncated wild type or Walker motif mutants of NBF1 and NBF2. Only NBF2-W<sub>A</sub> motif mutation NBF2-W<sub>A</sub> (K1385M) did not block Syn-1A inhibition of K<sub>ATP</sub> channels. W<sub>B</sub> motif mutants NBF1-W<sub>B</sub> (D854N) and NBF2-W<sub>B</sub> (D1506N), like their respective wild type proteins, blocked Syn-1A inhibition of K<sub>ATP</sub> currents. Also shown is tolbutamide (0.3 mM) inhibition of K<sub>ATP</sub> currents.

**Supplementary Figure 3. Both W<sub>B</sub> motif mutants NBF1-W<sub>B</sub> (D854N) (in A) and NBF2-W<sub>B</sub> (D1506N) (in B), like their respective wild type proteins, can disrupt Syn-1A interaction with SUR1 in live cells.** In **A** and **B**, *(i)* are the representative FRET recordings; scale bar indicates 5 μm and vertical scale bar indicates the FRET efficiency in pseudocolor. Summaries of data are shown in a graph *(ii)* and bar diagram *(iii)*, mean ± S.E.M., N=7 for each. \*\*\* indicate p < 0.001. In both **A** and **B**, addition of the respective wild type proteins (1 μM) after the application of the W<sub>B</sub> motif mutant proteins (1 μM) did not further reduce FRET signals that were previously reduced by the W<sub>B</sub> motif mutants.

**A (i) NBF1  $W_A$**

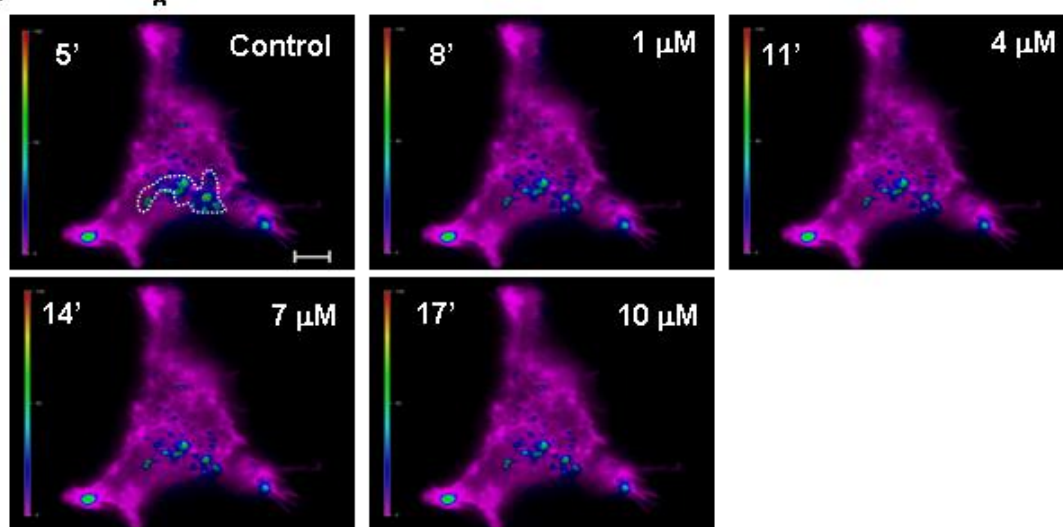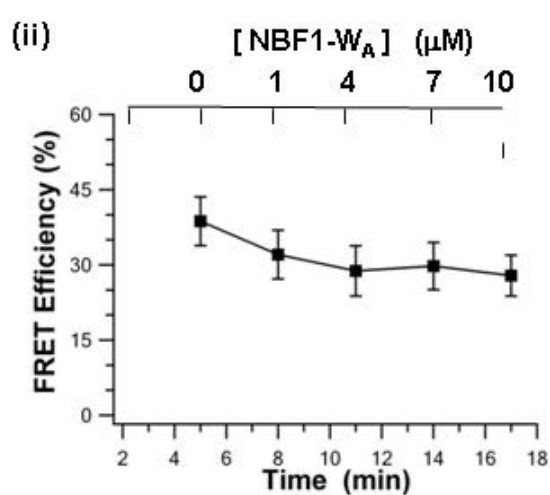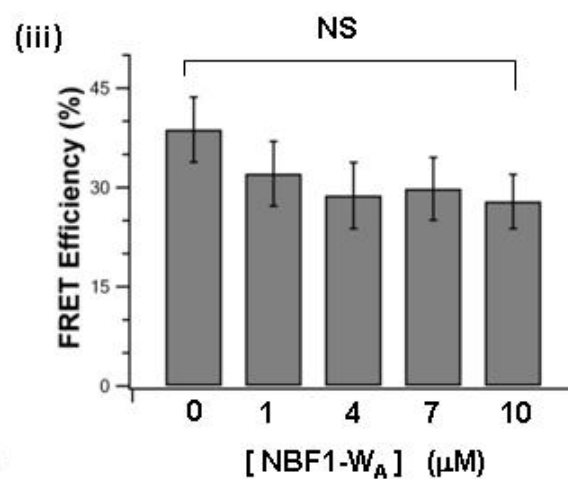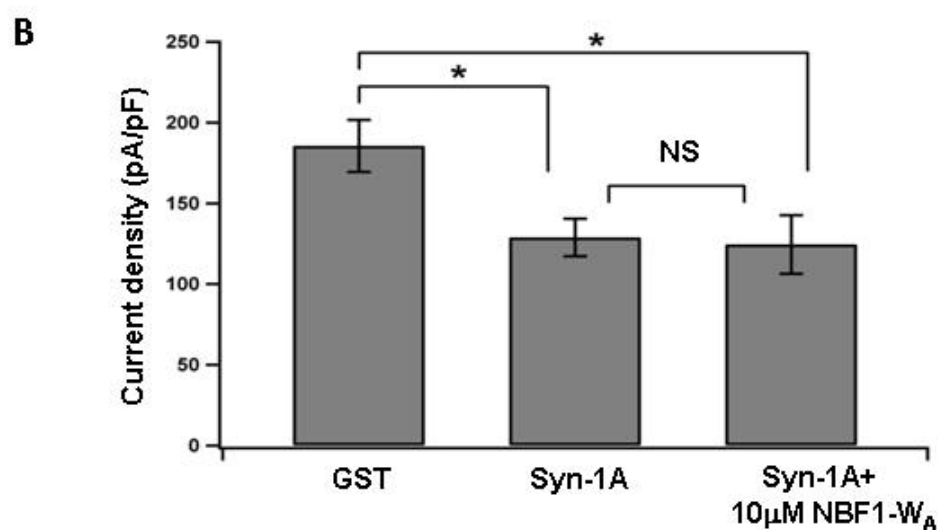

**Supplementary figure 1**

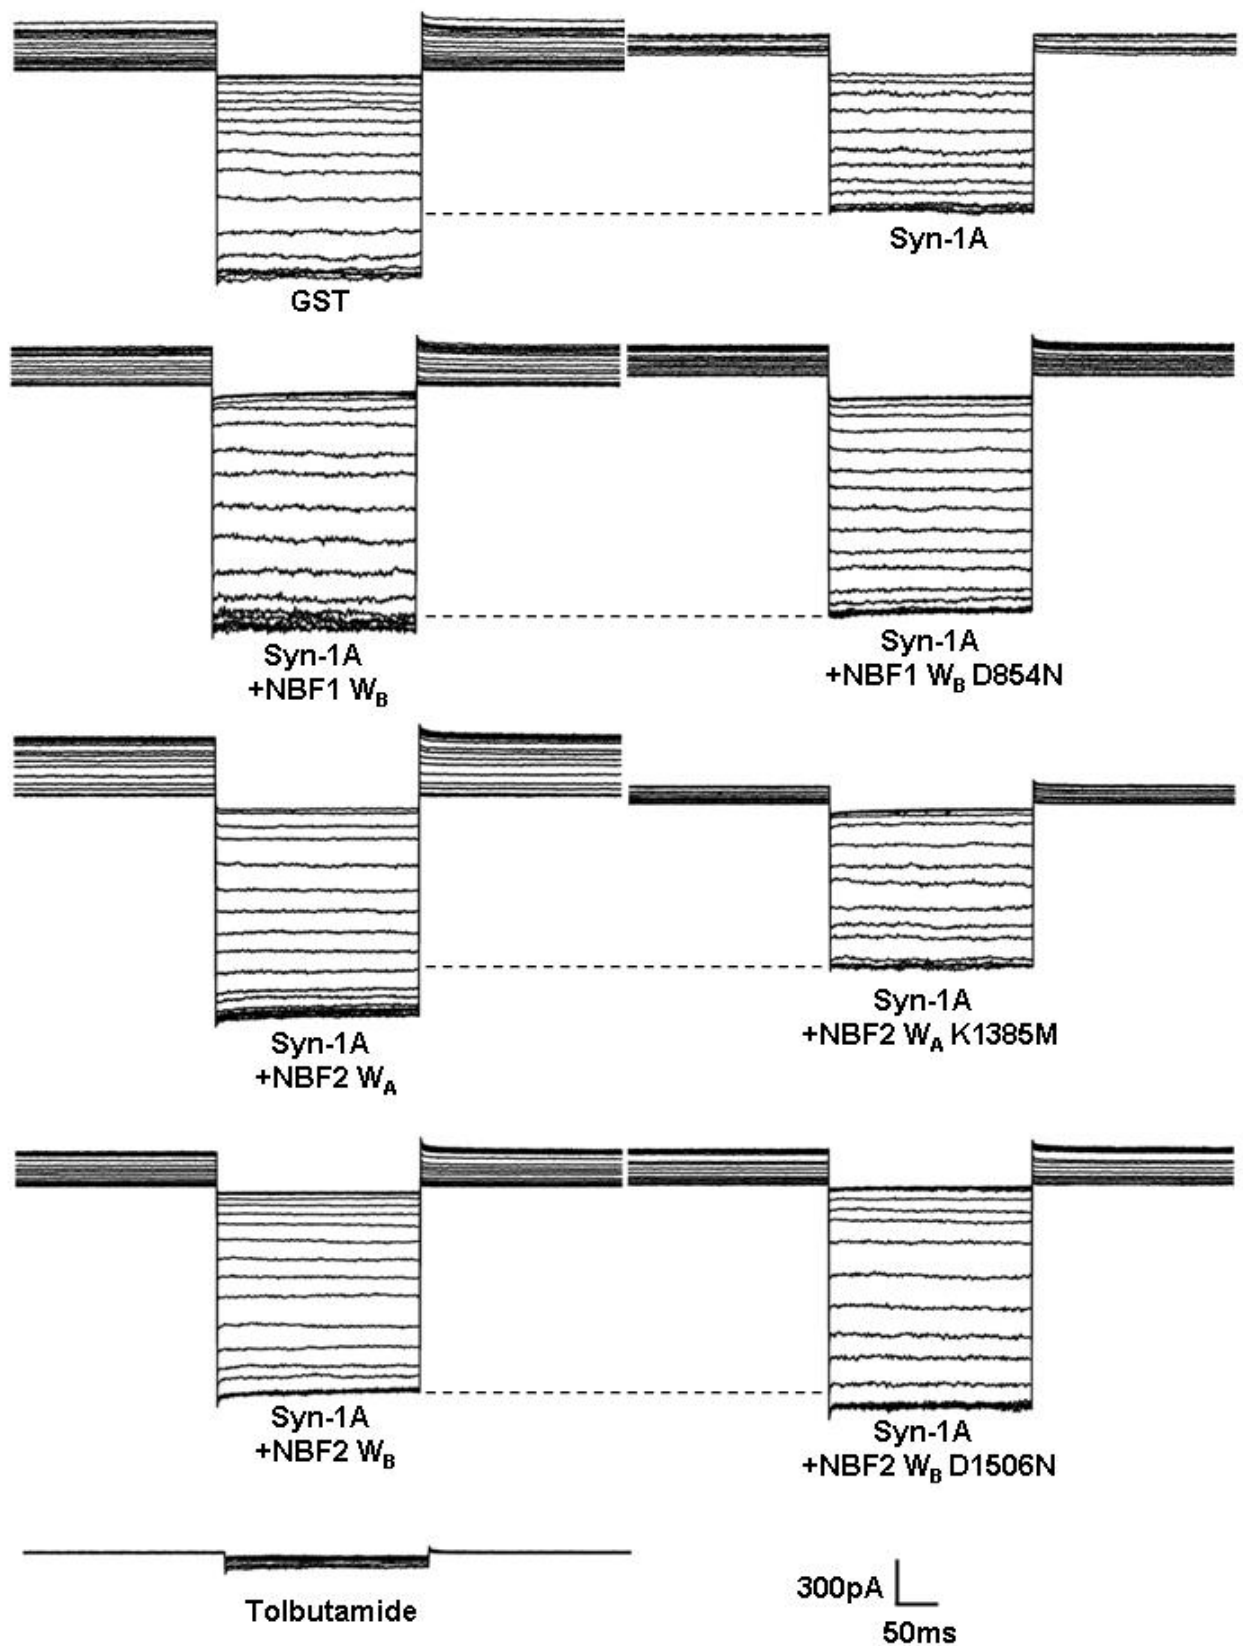

Supplementary figure 2

**A (i) NBF1  $W_B$**

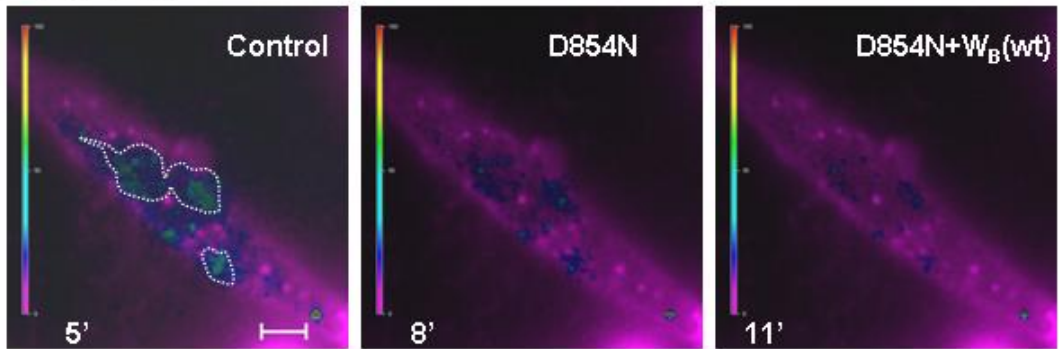

**(ii) NBF1  $W_B$**

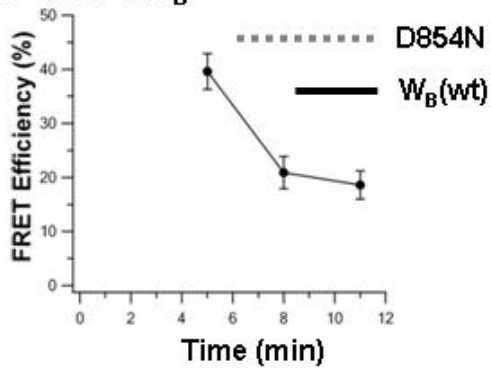

**(iii)**

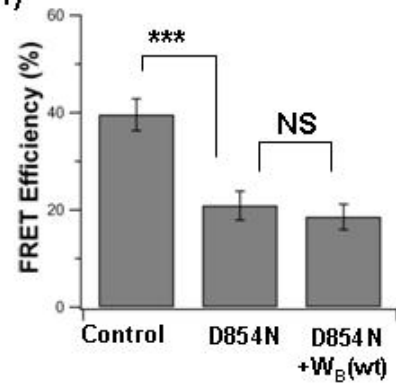

**B (i) NBF2  $W_B$**

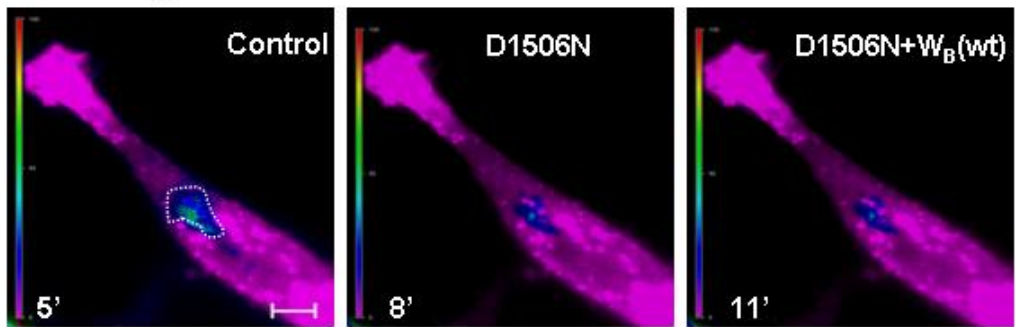

**(ii) NBF2  $W_B$**

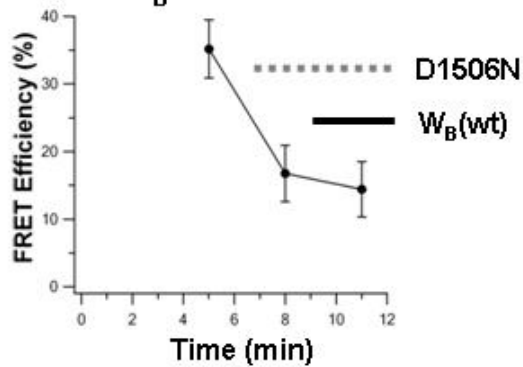

**(iii)**

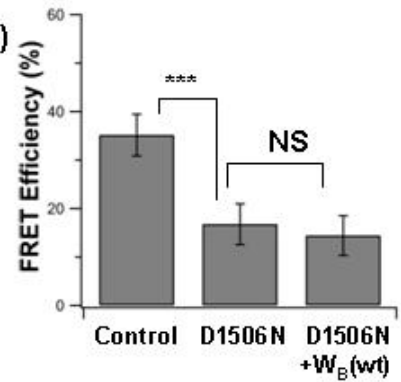

**Supplementary figure 3**
